## Research Article

# Earlier snowmelt and warming lead to earlier but not necessarily more plant growth

Carolyn Livensperger<sup>1\*</sup>, Heidi Steltzer<sup>2</sup>, Anthony Darrouzet-Nardi<sup>3</sup>, Patrick F. Sullivan<sup>4</sup>, Matthew Wallenstein<sup>1</sup> and Michael N. Weintraub<sup>5</sup>

<sup>1</sup> Department of Ecosystem Science and Sustainability, Colorado State University, Fort Collins, CO 80523, USA

<sup>2</sup> Biology Department, Fort Lewis College, Durango, CO 81301, USA

<sup>3</sup> Department of Biological Sciences, University of Texas at El Paso, El Paso, TX 79968, USA

<sup>4</sup> Environment and Natural Resources Institute, University of Alaska Anchorage, Anchorage, AK 99508, USA

<sup>5</sup> Department of Environmental Sciences, University of Toledo, Toledo, OH 43606, USA

**Received:** 19 November 2015; **Accepted:** 14 March 2016; **Published:** 13 April 2016

**Associate Editor:** Colin M. Orians

**Citation:** Livensperger C, Steltzer H, Darrouzet-Nardi A, Sullivan PF, Wallenstein M, Weintraub MN. 2016. Earlier snowmelt and warming lead to earlier but not necessarily more plant growth. *AoB PLANTS* 8: plw021; doi:10.1093/aobpla/plw021

**Abstract.** Climate change over the past ~50 years has resulted in earlier occurrence of plant life-cycle events for many species. Across temperate, boreal and polar latitudes, earlier seasonal warming is considered the key mechanism leading to earlier leaf expansion and growth. Yet, in seasonally snow-covered ecosystems, the timing of spring plant growth may also be cued by snowmelt, which may occur earlier in a warmer climate. Multiple environmental cues protect plants from growing too early, but to understand how climate change will alter the timing and magnitude of plant growth, experiments need to independently manipulate temperature and snowmelt. Here, we demonstrate that altered seasonality through experimental warming and earlier snowmelt led to earlier plant growth, but the aboveground production response varied among plant functional groups. Earlier snowmelt without warming led to early leaf emergence, but often slowed the rate of leaf expansion and had limited effects on aboveground production. Experimental warming alone had small and inconsistent effects on aboveground phenology, while the effect of the combined treatment resembled that of early snowmelt alone. Experimental warming led to greater aboveground production among the graminoids, limited changes among deciduous shrubs and decreased production in one of the dominant evergreen shrubs. As a result, we predict that early onset of the growing season may favour early growing plant species, even those that do not shift the timing of leaf expansion.

**Keywords:** Arctic tussock tundra; climate change; plant phenology; plant production; seasonality.

## Introduction

Seasonality in temperate to polar ecosystems is shifting through earlier seasonal warming and changes in precipitation regimes that lead to earlier snowmelt (Schwartz *et al.* 2006; Hayhoe *et al.* 2007; Ernakovich *et al.* 2014). Plant communities are responding through changes in timing of life-cycle events such as leaf expansion and

flowering (i.e. phenology) (Fitter and Fitter 2002; Thompson and Clark 2008), shifts in species relative abundance (Harte and Shaw 1995; Willis *et al.* 2008), species' range shifts (Walther *et al.* 2005; Gottfried *et al.* 2012) and greater aboveground plant production (Knapp and Smith 2001; Wang *et al.* 2012). These observations of altered seasonality and plant community changes

\* Corresponding author's e-mail address: clivensp@rams.colostate.edu

Published by Oxford University Press on behalf of the Annals of Botany Company.

This is an Open Access article distributed under the terms of the Creative Commons Attribution License (<http://creativecommons.org/licenses/by/4.0/>), which permits unrestricted reuse, distribution, and reproduction in any medium, provided the original work is properly cited.

correspond to a period of increasing global temperatures, but experiments are still needed to determine mechanisms and develop predictive models as climate change continues (Pau *et al.* 2011; Richardson *et al.* 2012).

Temperature and photoperiod are known plant phenological cues that determine the timing of spring events, such as bud burst, leaf emergence and canopy development, and flowering (Cleland *et al.* 2007; Körner and Basler 2010; Polgar and Primack 2011). Experimental warming studies using different techniques, such as active warming through overhead infrared heaters or passive warming with open-top chambers (OTCs), demonstrate that many species begin growth and flowering earlier in warmed versus control plots (Cleland *et al.* 2006; Sherry *et al.* 2007; Reyes-Fox *et al.* 2014). However, responses can vary with some species not shifting or delaying the timing of spring events under warmed conditions (Hollister *et al.* 2005a; Reyes-Fox *et al.* 2014; Marchin *et al.* 2015). Similarly, long-term observations of phenological response to climate warming over time show an overall advance in timing of spring of an estimated 5–6 days °C<sup>-1</sup> (Wolkovich *et al.* 2012), but with interspecific variation (Fitter and Fitter 2002; Menzel *et al.* 2006). The variation in response suggests that phenology is cued by other environmental variables (e.g. photoperiod) for species within and across diverse plant communities from tundra, grassland and forest biomes.

The influence of snow cover on plant phenology is less well understood, in part because temperature change due to climate change and experimental warming influence when an area becomes snow-free. Development of early emerging species may be closely synchronized with timing of snowmelt in Arctic and alpine ecosystems (Galen and Stanton 1995; Høye *et al.* 2007), and indeed, later snowmelt due to increased snow depth has been shown to delay bud break of deciduous shrubs (Borner *et al.* 2008; Sweet *et al.* 2014). However, few experiments have examined the isolated effects of early snowmelt and summer warming in the Arctic or alpine, and often these effects are confounded either by the use of warming treatments such as OTCs to accelerate snowmelt or by the snow removal that reduces water inputs (Wipf and Rixen 2010).

Multifactor global change experiments have shown that plant production is sensitive to manipulations of abiotic factors, including air and soil warming, nutrients, CO<sub>2</sub> and precipitation (Fay *et al.* 2003; Zavaleta *et al.* 2003; Dukes *et al.* 2005; Dawes *et al.* 2011). Response to these factors is complex, with variation across plant communities due to differences in limiting factors (Smith *et al.* 2015), and variation within communities due to differences in functional group responses (Zavaleta *et al.* 2003; Wahren *et al.* 2005; Muldavin *et al.* 2008). In the

Arctic, production is strongly limited by nutrient availability, which in turn is sensitive to temperature and ongoing changes in the timing of seasonal climatic events such as snowmelt, soil thaw, the onset of freezing and snowfall (Billings and Mooney 1968; Weintraub and Schimel 2005). In recent years, both observational and experimental studies have linked increased production, specifically that of deciduous shrubs and graminoids, to warmer temperatures (Tape *et al.* 2006; Walker *et al.* 2006; Forbes *et al.* 2010; Elmendorf *et al.* 2012b; Sistla *et al.* 2013). However, a number of experiments that have manipulated summer temperature in both Arctic and alpine regions did not find a consistent increase in community-level aboveground net primary production (ANPP); rather, individual species or functional groups varied in their response (Chapin *et al.* 1995; Harte and Shaw 1995; Hollister *et al.* 2005b). Evergreen shrubs have responded to warming with positive, negative or no changes in production (Hollister *et al.* 2005b; Walker *et al.* 2006; Campioli *et al.* 2012), and they may be less likely to show short-term growth responses due to their conservative growth strategy (Chapin and Shaver 1996; Starr *et al.* 2008).

Changes in plant production may also be expected to vary in relation to changes in the timing of growth; for example, earlier leaf expansion may lead to greater productivity (Richardson *et al.* 2010). There is evidence that phenological ‘tracking’ of climate change across biomes can result in positive growth responses, through increased abundance, production or flowering effort (Cleland *et al.* 2012). However, physiological constraints and interactions of the affected species may prevent some plants from taking advantage of an earlier start to the growing season (Schwartz 1998; Richardson *et al.* 2010; Polgar and Primack 2011). One such constraint could be negative impacts of exposure to cold temperatures and freezing damage if snow melts early (Inouye 2008; Wipf *et al.* 2009). Differences in the onset and duration of plant growth can also vary due to differences in plant community composition; for example, deciduous shrub-dominated communities in Arctic tundra were shown to have longer peak growing seasons and greater carbon uptake than evergreen/graminoid communities in the same region (Sweet *et al.* 2015).

In the Arctic, climate is changing at a faster rate than in other regions, a trend that is expected to continue (Christensen *et al.* 2013). Rapidly increasing air temperature (~1 °C decade<sup>-1</sup>) (Christensen *et al.* 2013), earlier snowmelt (3–5 days decade<sup>-1</sup>) and later snowfall are changing the seasonality of this ecosystem (Serreze *et al.* 2000; Ernakovich *et al.* 2014). Landscape-scale observations via remote sensing suggest that vegetation phenology in the Arctic is indeed advancing and plant

production is increasing (Myneni et al. 1997; Jia et al. 2003, 2009; Fraser et al. 2011; Zeng et al. 2011). Earlier snowmelt, especially in combination with warmer temperatures in early spring, should benefit plant growth, since it is the time of year with the greatest light and nutrient availability (Weintraub and Schimel 2005; Edwards and Jefferies 2013). However, experiments are needed to determine how shifts in seasonality will affect phenology of Arctic species, and how changes in phenology affect plant productivity and future community composition.

In Arctic tussock tundra, we established a 3-year study in which we altered seasonality through the independent and combined manipulation of air temperature and timing of snowmelt. We examined the response of spring phenology and plant production for key tundra species and hypothesized that:

- (1) The timing of snowmelt and temperature are cues for initiating plant growth. We predicted that leaf appearance and expansion would advance due to early snowmelt and air warming for all species.
- (2) The timing of snowmelt and temperature affect plant production. We predicted that early snowmelt and warmer temperatures would increase production of deciduous shrub, graminoid and forb species, but would not change production of evergreen shrubs.
- (3) The timing of plant growth affects plant production. We predicted that earlier leaf expansion would lead to greater aboveground biomass at peak season.

## Methods

### Site description

The experiment was conducted near Imnavait Creek on the North Slope of Alaska, close to the Arctic Long-Term Ecological Research (LTER) site at Toolik Field Station. The plant community at Imnavait is moist acidic tussock tundra, characterized by the tussock forming sedge *Eriophorum vaginatum* and a high moss cover, including *Hylocomium* spp., *Aulacomnium* spp. and *Dicranum* spp. Associated species include another sedge, *Carex bigelowii*, the deciduous shrubs *Betula nana* and *Salix pulchra*, the evergreen shrubs *Ledum palustre*, *Vaccinium vitis-idaea* and *Cassiope tetragonum*, and a variety of forbs [see Supporting Information—Table S1]. The old (~120 000–600 000 years; Whittinghill and Hobbie 2011), acidic soil (mean pH of 4.5) at this site is underlain by continuous permafrost, with an uneven surface layer of organic material 0–20 cm thick (Walker et al. 1994) and variable soil moisture.

### Altered seasonality

For 3 years (2010–12), snowmelt was accelerated in five  $8 \times 12$  m plots using radiation-absorbing black 50 % shade cloth that was placed over the snowpack in late April–early May. The dark fabric accelerated melt and allowed for minimal disturbance of the snowpack. The fabric was removed when plots became 80 % snow-free (determined by daily visual estimates). In 2012, we achieved a 10-day acceleration in the timing of snowmelt with early snowmelt plots becoming snow-free on May 16 and control plots snow-free on May 26. Snow was melted 4 and 15 days earlier in 2010 and 2011, respectively. As plots became snow-free, OTCs were deployed on subplots within the accelerated snowmelt and control areas. The OTCs are hexagonal chambers with sloping sides, constructed of Plexiglas material that allows transmittance of wavelengths of light in the visible spectrum, enabling passive warming primarily through trapping solar radiation (Marion et al. 1997). Open-top chambers warmed air temperatures by an average of 1.4 °C in 2012. Further details of treatment effects on air temperature, soil temperature and soil moisture are available in Supporting Information—Table S2. The approximate area of both control and warming subplots was 1 m<sup>2</sup>. Treatments were replicated five times in a full factorial, randomized split-plot design. Treatment abbreviations are as follows throughout the article: control (C), warming (W), early snowmelt (ES) and combined (W × ES).

### Phenology

Five individuals of seven species were marked in each subplot and phenology events were monitored every 2–3 days from snowmelt through mid-August. Observations of ‘leaf appearance’ and ‘leaf expansion’ were recorded for each individual. Although definitions of events varied between functional groups, we generally considered leaf appearance to be the first observation of new green leaves and leaf expansion to be when an individual had a leaf that was fully expanded or had reached a previously determined size. For deciduous shrubs (*B. nana* and *S. pulchra*), leaf appearance was recorded at the first observed leaf bud burst, and leaf expansion when an individual had at least one fully unfurled leaf anywhere on the plant. Similarly, evergreen shrub (*L. palustre* and *V. vitis-idaea*) leaf appearance was recorded when the first leaf bud was visible, and full leaf expansion occurred when at least one leaf bud was fully open and leaves unfurled. *Eriophorum vaginatum* retains green leaf material over winter and often begins growth of new leaves and re-greening of old leaves before snow is completely melted (Chapin et al. 1979). Therefore, we recorded leaf appearance (new leaves >1 cm length)

for *E. vaginatum* on the day of snowmelt, but did not consider this as a treatment effect. Rather than continuously measuring leaf length to record full leaf expansion, we determined leaf expansion for *E. vaginatum* to have occurred when a new leaf reached >4 cm length. We only considered growth of new leaves, which were identified as those with no senescent material at the leaf tip. We followed similar protocol for *C. bigelowii* leaf appearance (new leaf >1 cm length) and leaf expansion (new leaf >4 cm length), but leaf appearance was considered a treatment effect. First leaf appearance for the forb *P. bistorta* was marked when leaves were visible (generally >1 cm length) and leaf expansion when leaves were fully unrolled and >5 cm length.

### Plant production

A destructive harvest to measure plant production, as characterized by growth of individuals in the current year, was carried out on the same species for which phenology was observed. The seven species chosen represented four functional groups and comprised the majority of vascular plant cover at our site [see **Supporting Information—Table S1**]. The harvest took place in the third year of treatments at peak growing season, which was determined by phenology observations and analysis of daily normalized difference vegetation index measurements showing that peak greenness (i.e. full canopy development) had occurred in each treatment (C. Livensperger and H. Steltzer, unpublished data). Randomly selected individuals were clipped in the field, and then taken back to the laboratory where old and new growth was separated and biomass measured. Eight individuals each of *B. nana*, *S. pulchra* and *L. palustre*, and 16 individuals each of *V. vitis-idea*, *E. vaginatum*, *C. bigelowii* and *P. bistorta* were collected from each subplot and pooled by species. Plant material was separated by tissue type, dried at 60 °C for 48 h and weighed.

Mean individual production for each species was calculated as the sum of current years' biomass divided by the number of individuals collected. Current years' biomass included leaves, new stems and secondary growth for shrub species. For graminoids and a forb, all live above-ground plant tissue was used, which may have included some growth from previous years for *E. vaginatum* and *C. bigelowii*. We calculated current annual secondary stem growth for *B. nana*, *S. pulchra* and *L. palustre* as a proportion of standing stem biomass, using previously determined annual growth rates of woody stems from the nearby Toolik Lake LTER site (Bret-Harte et al. 2002). For these species, leaves contributed more to total biomass than the calculated secondary growth. Secondary growth for the remaining shrub species, *V. vitis-idea*, is negligible and, therefore, was left out of production

calculation for this species (Shaver 1986). Standing stem biomass, excluding current seasonal growth, for individual shrub stems varied among plots and likely is a result of variation prior to when the experiment was established. To control for this variation and better detect treatment effects, individual production data are presented in relation to standing stem biomass excluding current annual growth (i.e. g new production/g standing stem biomass).

### Statistical analyses

For all analyses, the experiment was treated as a blocked split-plot design, where a large early snowmelt plot paired with an equally sized control plot comprise a single block. Plant responses and environmental variables were analysed using a mixed-model analysis of variance (ANOVA; SAS v 9.2, SAS Institute, Inc., Cary, NC, USA), with early snowmelt (ES) as the main plot factor and warming (W) as the within plot factor. A random effect of block was included to control for inherent variation between the five replicates. All data were checked for normality and were found to meet the assumptions of ANOVA. Linear regression was used to analyse the relationship between phenology and plant growth.

## Results

### Plant phenology

Early snowmelt was a strong driver of change in both the timing and rate of leaf appearance and expansion. These events advanced due to early snowmelt alone for all species except the forb, *P. bistorta* (Fig. 1), and the amount of change in timing varied between events, species and functional groups. The largest change in timing was a 10-day advance in leaf expansion for *E. vaginatum* (Fig. 1), corresponding to the 10-day advance in snowmelt through our snow manipulation. Leaf appearance and expansion of evergreen and deciduous shrubs were significantly earlier due to early snowmelt alone, advancing by 1–8 days for *B. nana*, *S. pulchra*, *L. palustre* and *V. vitis-idea* (Fig. 1, Table 1). The advancement of leaf appearance versus leaf expansion differed in magnitude for *S. pulchra*, *V. vitis-idea* and *C. bigelowii*, by increasing the number of days between leaf appearance and leaf expansion by 2–5 days. For example, in the early snowmelt treatment, leaf appearance for *S. pulchra* occurred 8 days earlier than the control, while leaf expansion advanced by only 3 days. For deciduous shrubs, evergreen shrubs and the forb, the shift in phenology was less than the 10-day advance in snowmelt, increasing the number of days after snowmelt to when canopy development (i.e. leaf expansion) began; this effectively slowed the



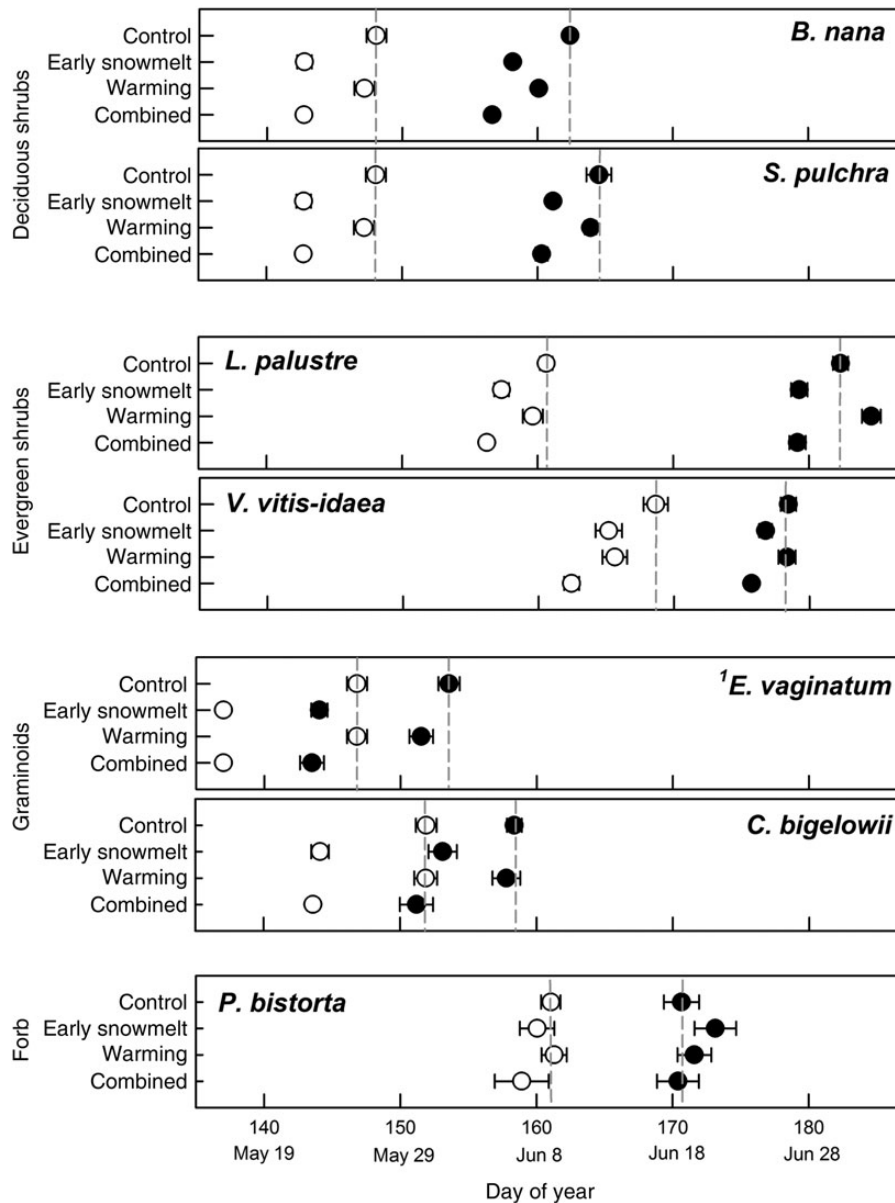

**Figure 1.** Dates of early-season phenology events, where open circles represent leaf appearance and filled circles represent leaf expansion. Points are the mean date of event  $\pm$  1 SEM. Vertical dashed lines denote mean event date for control plots. <sup>1</sup>*E. vaginatum* initiates growth underneath the snowpack so we did not consider leaf appearance to be a treatment effect; however, the event date is shown to signify the presence of new leaves at the time of snowmelt.

rate of plant production (Fig. 2, Table 2). The sedges, *E. vaginatum* and *C. bigelowii*, did not follow this pattern, with no evidence of a change in the number of days between leaf appearance and expansion (Fig. 2).

Warming also advanced the timing of leaf appearance and expansion for most species, but to a lesser extent than early snowmelt (Fig. 1, Table 1). All of the deciduous shrub and graminoid species advanced leaf phenology with warming alone, but only by 1 or 2 days (Fig. 1, Table 1). Evergreen shrubs showed contrasting responses to warming: leaf appearance for *V. vitis-idaea* advanced

by 3 days, while *L. palustre* leaf expansion was delayed for 2 days (Fig. 1, Table 1). Warming generally did not alter phenology in relation to the timing of snowmelt (Fig. 2, Table 2). One exception is that warming led to significantly faster leaf expansion following snowmelt for *B. nana*, effectively speeding plant production.

Phenological responses to the combination of early snowmelt and warming were generally comparable with the response to early snowmelt alone (Figs 1 and 2), and the interactive effect of warming  $\times$  early snowmelt on phenology was never significant (Table 1). For

**Table 1.** Results of mixed-model ANOVA on timing of early-season phenology events. Leaf appearance for *E. vaginatum* was not considered a treatment effect and was excluded from the analysis. Bold values indicate a significant main effect of the treatment at  $P \leq 0.05$ .

|                       | Warming |       |                   | Early snowmelt |       |                   | Warming × Early snowmelt |      |        |
|-----------------------|---------|-------|-------------------|----------------|-------|-------------------|--------------------------|------|--------|
|                       | df      | F     | P                 | df             | F     | P                 | df                       | F    | P      |
| Leaf appearance       |         |       |                   |                |       |                   |                          |      |        |
| <i>B. nana</i>        | 1, 85   | 0.88  | 0.3503            | 1, 4           | 9.46  | <b>0.0373</b>     | 1, 85                    | 1.49 | 0.2253 |
| <i>S. pulchra</i>     | 1, 71   | 0.21  | 0.6501            | 1, 8           | 20.24 | <b>0.0019</b>     | 1, 71                    | 0.15 | 0.7045 |
| <i>L. palustre</i>    | 1, 86   | 5.75  | <b>0.0186</b>     | 1, 4           | 21.53 | <b>0.0099</b>     | 1, 86                    | 0.00 | 0.9775 |
| <i>V. vitis-idaea</i> | 1, 83   | 15.08 | <b>0.0002</b>     | 1, 4           | 8.92  | <b>0.0405</b>     | 1, 83                    | 0.01 | 0.9241 |
| <i>C. bigelowii</i>   | 1, 83   | 0.16  | 0.6910            | 1, 4           | 65.58 | <b>0.0012</b>     | 1, 83                    | 0.20 | 0.6533 |
| <i>P. bistorta</i>    | 1, 65   | 0.13  | 0.7212            | 1, 7           | 1.34  | 0.2829            | 1, 65                    | 0.25 | 0.6184 |
| Leaf expansion        |         |       |                   |                |       |                   |                          |      |        |
| <i>B. nana</i>        | 1, 86   | 55.71 | <b>&lt;0.0001</b> | 1, 4           | 79.28 | <b>0.0008</b>     | 1, 86                    | 2.33 | 0.1308 |
| <i>S. pulchra</i>     | 1, 77   | 1.86  | 0.1766            | 1, 77          | 42.81 | <b>&lt;0.0001</b> | 1, 77                    | 0.04 | 0.8329 |
| <i>L. palustre</i>    | 1, 86   | 3.26  | 0.0743            | 1, 8           | 30.97 | <b>0.0006</b>     | 1, 86                    | 3.95 | 0.0501 |
| <i>V. vitis-idaea</i> | 1, 88   | 1.59  | 0.2108            | 1, 88          | 19.73 | <b>&lt;0.0001</b> | 1, 88                    | 1.04 | 0.3100 |
| <i>E. vaginatum</i>   | 1, 86   | 3.36  | 0.0702            | 1, 4           | 37.14 | <b>0.0033</b>     | 1, 86                    | 1.38 | 0.2436 |
| <i>C. bigelowii</i>   | 1, 84   | 1.64  | 0.2037            | 1, 4           | 31.25 | <b>0.0053</b>     | 1, 84                    | 0.55 | 0.4599 |
| <i>P. bistorta</i>    | 1, 70   | 0.13  | 0.7182            | 1, 70          | 0.30  | 0.5882            | 1, 70                    | 1.33 | 0.2525 |

evergreen shrubs, leaf appearance occurred earliest with the combined treatment, which was 1–3 days earlier than in snowmelt and warming alone (Fig. 1).

### Plant production

Although phenological events often occurred earlier in the year due to earlier snowmelt and warming, an increase in individual production was rarely observed. Rather, responses to early snowmelt and warming varied within and among functional groups. Differences were rarely significant (Table 3), in part due to the challenge of quantifying plant production in an ecosystem with high spatial variation.

However, the magnitude of change often represented a high proportion of production in this low productivity system. Deciduous shrub species differed in their response, with *S. pulchra* decreasing individual production by 6–11 % and *B. nana* showing little change across the three treatments (Table 3). Evergreen shrub species increased individual production by 28 and 8 % for *L. palustre* and *V. vitis-idaea*, respectively, due to early snowmelt (Table 3). Individual production of *P. bistorta*, the forb, was highly variable within treatments; for example, control plants ranged from 36 to 297 mg biomass. The most evident response for this species was a large, but non-significant, decrease (36 %) in production due to early snowmelt (Table 3).

The effect of warming on production was statistically significant for two species and led to the largest proportional changes (Fig. 3, Table 3). Both graminoid species responded positively to warming. Mean individual production for *E. vaginatum* increased by 36 %, which was the greatest proportional increase of any species (Fig. 3, Table 3). When early snowmelt and warming were combined, *E. vaginatum* increased individual production by 27 % relative to the control (Fig. 3, Table 3). The other graminoid, *C. bigelowii*, increased individual production by 17 % with warming and 24 % with warming and early snowmelt, although these increases were not significant (Fig. 3, Table 3). An evergreen shrub, *V. vitis-idaea*, had relatively large decreases relative to the control with warming (21 %) and the combined treatment (42 %), and the main effect of warming was significant (Table 3).

### Phenology and production relationship

Across all species and for all treatments, earlier leaf expansion was associated with increased production (Fig. 4,  $y = 135.52 - 0.81x$ ,  $R^2 = 0.09$ ,  $P = 0.0021$ ). This relationship reflects differences in the timing of leaf expansion among growth forms and the response of individual plant production to early snowmelt and warming. Species varied in the timing of leaf expansion by 40 days, a range that was expanded by 14 days due to altered seasonality. Early

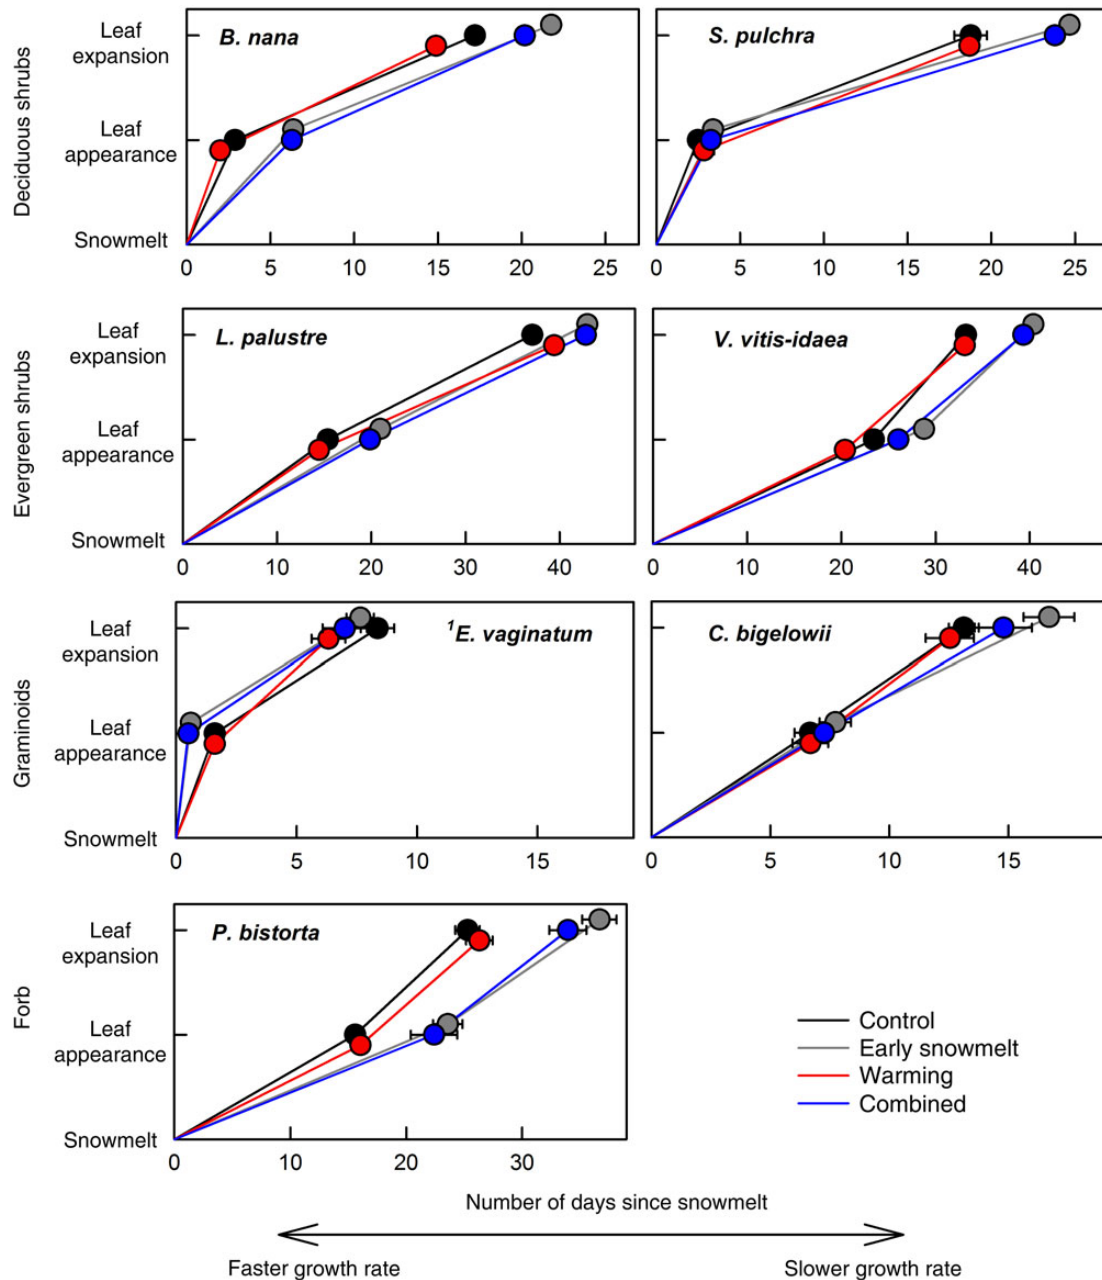

**Figure 2.** Number of days since snowmelt for early-season phenology events. Points are average number of days since snowmelt  $\pm$  1 SEM. A greater number of days until full leaf expansion are interpreted as a slower growth rate. Note different scales on x-axes. <sup>1</sup>As noted in Fig. 1, leaf appearance of *E. vaginatum* is not considered a treatment effect but is shown for clarity.

expanding species (*E. vaginatum* and *C. bigelowii*) had increases in production, while later expanding species (*L. palustre* and *V. vitis-idaea*) had some increases and also large decreases in production as a result of warming. Across functional groups, warming drove the relationship between timing of leaf expansion and individual production, as shown by significantly negative regression slopes within the warming and combined treatments (Fig. 5; C:  $y = -62.7 + 0.41x$ ,  $R^2 = 0.01$ ,

$P = 0.53$ ; ES:  $y = 43.16 - 0.24x$ ,  $R^2 = 0.01$ ,  $P = 0.547$ ; W:  $y = 188.66 - 1.11x$ ,  $R^2 = 0.13$ ,  $P = 0.03$ ; W  $\times$  ES:  $y = 200.26 - 1.23x$ ,  $R^2 = 0.24$ ,  $P = 0.005$ ). Within functional groups, there was no relationship between the timing of leaf expansion and individual production, despite earlier leaf expansion due to early snowmelt and warming (Fig. 6; deciduous shrubs:  $y = 216.43 - 1.37x$ ,  $R^2 = 0.06$ ,  $P = 0.202$ ; evergreen shrubs:  $y = -606.13 + 3.37x$ ,  $R^2 = 0.08$ ,  $P = 0.129$ ; graminoids:  $y = 50.74 - 0.18x$ ,

**Table 2.** Results of mixed-model ANOVA on duration of time since snowmelt for early-season phenology events. Leaf appearance for *E. vaginatum* was not considered a treatment effect and was excluded from the analysis. Bold values indicate a significant main effect of the treatment at  $P \leq 0.05$ .

|                       | Warming |       |                   | Early snowmelt |        |                   | Warming × Early snowmelt |      |               |
|-----------------------|---------|-------|-------------------|----------------|--------|-------------------|--------------------------|------|---------------|
|                       | df      | F     | P                 | df             | F      | P                 | df                       | F    | P             |
| Leaf appearance       |         |       |                   |                |        |                   |                          |      |               |
| <i>B. nana</i>        | 1, 86   | 1.00  | 0.3210            | 1, 8           | 22.56  | <b>0.0015</b>     | 1, 86                    | 1.35 | 0.2479        |
| <i>S. pulchra</i>     | 1, 74   | 0.14  | 0.7070            | 1, 7           | 1.25   | 0.2975            | 1, 74                    | 0.26 | 0.6112        |
| <i>L. palustre</i>    | 1, 86   | 5.73  | <b>0.0188</b>     | 1, 4           | 33.32  | <b>0.0047</b>     | 1, 86                    | 0.00 | 0.9889        |
| <i>V. vitis-idaea</i> | 1, 83   | 15.03 | <b>0.0002</b>     | 1, 4           | 30.73  | <b>0.0057</b>     | 1, 83                    | 0.01 | 0.9179        |
| <i>C. bigelowii</i>   | 1, 87   | 0.16  | 0.6933            | 1, 87          | 1.81   | 0.1823            | 1, 87                    | 0.19 | 0.6639        |
| <i>P. bistorta</i>    | 1, 65   | 0.10  | 0.7576            | 1, 65          | 36.75  | <b>&lt;0.0001</b> | 1, 65                    | 0.49 | 0.4859        |
| Leaf expansion        |         |       |                   |                |        |                   |                          |      |               |
| <i>B. nana</i>        | 1, 85   | 55.48 | <b>&lt;0.0001</b> | 1, 4           | 40.62  | <b>0.0030</b>     | 1, 85                    | 2.36 | 0.1281        |
| <i>S. pulchra</i>     | 1, 75   | 0.89  | 0.3475            | 1, 4           | 45.21  | <b>0.0028</b>     | 1, 75                    | 0.35 | 0.5537        |
| <i>L. palustre</i>    | 1, 90   | 3.44  | 0.0669            | 1, 90          | 59.34  | <b>&lt;0.0001</b> | 1, 90                    | 4.16 | <b>0.0444</b> |
| <i>V. vitis-idaea</i> | 1, 85   | 1.50  | 0.2234            | 1, 4           | 173.94 | <b>0.0002</b>     | 1, 85                    | 0.95 | 0.3323        |
| <i>E. vaginatum</i>   | 1, 87   | 3.51  | 0.0645            | 1, 4           | 0.00   | 0.9497            | 1, 87                    | 1.33 | 0.2526        |
| <i>C. bigelowii</i>   | 1, 84   | 1.71  | 0.1951            | 1, 4           | 4.42   | 0.1025            | 1, 84                    | 0.54 | 0.4635        |
| <i>P. bistorta</i>    | 1, 70   | 0.26  | 0.6115            | 1, 70          | 51.99  | <b>&lt;0.0001</b> | 1, 73                    | 1.66 | 0.2013        |

**Table 3.** Results of mixed-model ANOVA on individual biomass. Bold values indicate a significant main effect of the treatment at  $P \leq 0.05$ .

|                       | Warming |             |               | Early snowmelt |      |        | Warming × Early snowmelt |      |        |
|-----------------------|---------|-------------|---------------|----------------|------|--------|--------------------------|------|--------|
|                       | df      | F           | P             | df             | F    | P      | df                       | F    | P      |
| Individual biomass    |         |             |               |                |      |        |                          |      |        |
| <i>B. nana</i>        | 1, 16   | 0           | 0.9859        | 1, 16          | 0.22 | 0.6466 | 1, 16                    | 1.02 | 0.3287 |
| <i>S. pulchra</i>     | 1, 12   | 0.17        | 0.6900        | 1, 12          | 0.18 | 0.6783 | 1, 12                    | 1.18 | 0.2990 |
| <i>L. palustre</i>    | 1, 8    | 0.73        | 0.4185        | 1, 8           | 1.35 | 0.2782 | 1, 8                     | 0.43 | 0.5283 |
| <i>V. vitis-idaea</i> | 1, 16   | <b>5.39</b> | <b>0.0338</b> | 1, 16          | 0.19 | 0.6686 | 1, 16                    | 0.95 | 0.3454 |
| <i>E. vaginatum</i>   | 1, 8    | <b>7.48</b> | <b>0.0256</b> | 1, 4           | 0.20 | 0.6757 | 1, 8                     | 2.35 | 0.1635 |
| <i>C. bigelowii</i>   | 1, 12   | 1.51        | 0.2425        | 1, 12          | 1.04 | 0.3277 | 1, 12                    | 0.16 | 0.6926 |
| <i>P. bistorta</i>    | 1, 16   | 0.85        | 0.3831        | 1, 16          | 0.08 | 0.7808 | 1, 16                    | 0.28 | 0.6106 |

$R^2 = 0.002$ ,  $P = 0.7$ ; forb:  $y = 276.82 - 1.72x$ ,  $R^2 = 0.03$ ,  $P = 0.582$ ).

## Discussion

Our results showed consistent advancement of leaf appearance and expansion, indicating that spring phenology of moist acidic tundra species is sensitive to early snowmelt and warming, which is consistent with our

first hypothesis. Warmer temperatures have been shown to advance spring phenology in other systems, particularly for deciduous shrubs where budburst is well predicted by growing degree-days (Polgar and Primack 2011). However, we found that species were more responsive to early snowmelt, by advancing timing of events to a greater extent than with warming alone. Timing of snowmelt has been shown to be a cue for spring phenology in Arctic and alpine ecosystems (Arft et al.



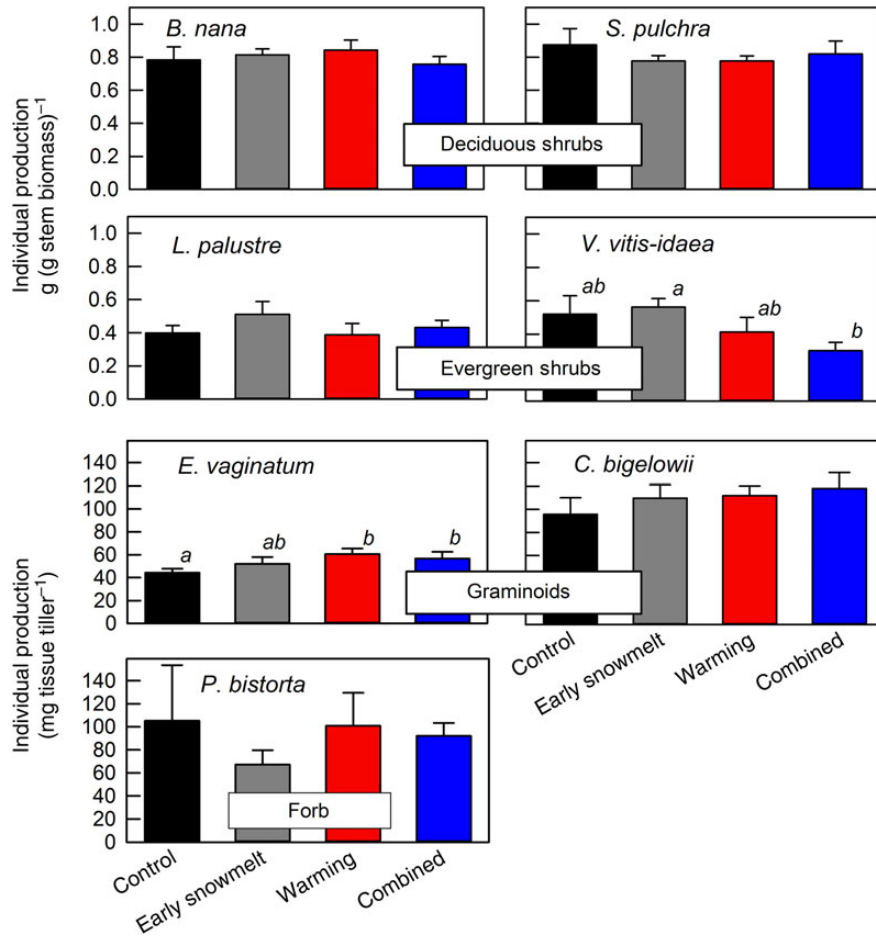

**Figure 3.** Biomass of individual species harvested in the third year of altered seasonality. For deciduous and evergreen shrubs, bars represent means of proportion of current annual growth to standing stem biomass of the individual,  $\pm 1$  SEM. For graminoids and a forb, bars represent means of aboveground biomass,  $\pm 1$  SEM. Letters (a and b) represent groupings based on least squares means of the ANOVA mixed model, where bars with the same letter are not statistically different at  $P \leq 0.05$ .

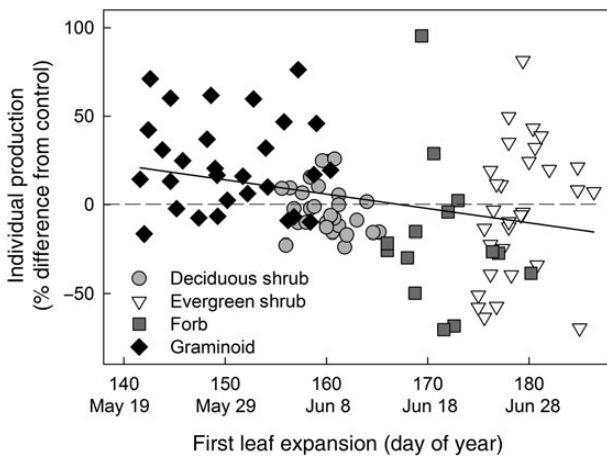

**Figure 4.** Relationship between phenology and production, with production (y-axis) represented as the per cent difference from the control mean ANPP for each species ( $100 \times \text{treatment} - \text{control mean} / \text{control}$ ). Each point represents one species, treatment and plot. The solid line is the linear regression (see Results for details).

1999; Steltzer et al. 2009), but experiments often confound the effects of warming and timing of snowmelt. Arctic species generally have a wide range of physiological tolerance, allowing spring growth to occur despite temperatures at or near freezing (Billings and Mooney 1968), and our experiment shows that early snowmelt can advance phenology independent of warming.

Along with clear advances in spring phenology, we also observed slower rates of leaf expansion for many species in response to early snowmelt, supporting the conservative growth strategy demonstrated by many Arctic and alpine species to compensate for interannual variation in snowmelt timing (Billings and Mooney 1968). Surprisingly, only one species, *B. nana*, expanded its leaves at a faster rate with warming. It may be that soil temperature, which warmed to a lesser extent than air temperature [see Supporting Information—Table S2], is an additional cue for rate of leaf expansion for most species. Plants that expand leaves early may be susceptible to frost damage if

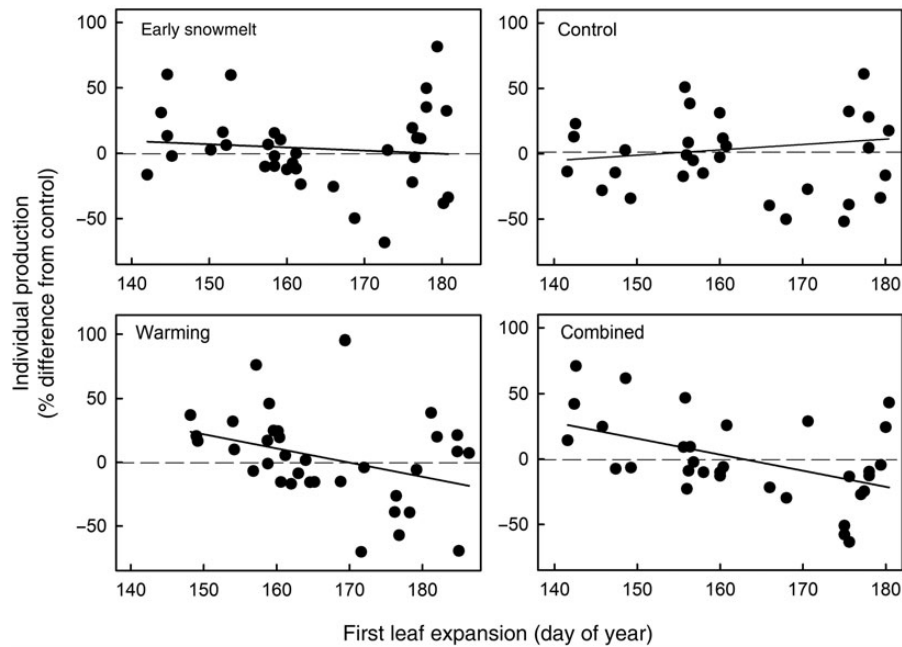

**Figure 5.** Relationship between phenology and production by treatment type. Data follow Fig. 4. Solid lines are linear regressions for each functional group (see Results for details).

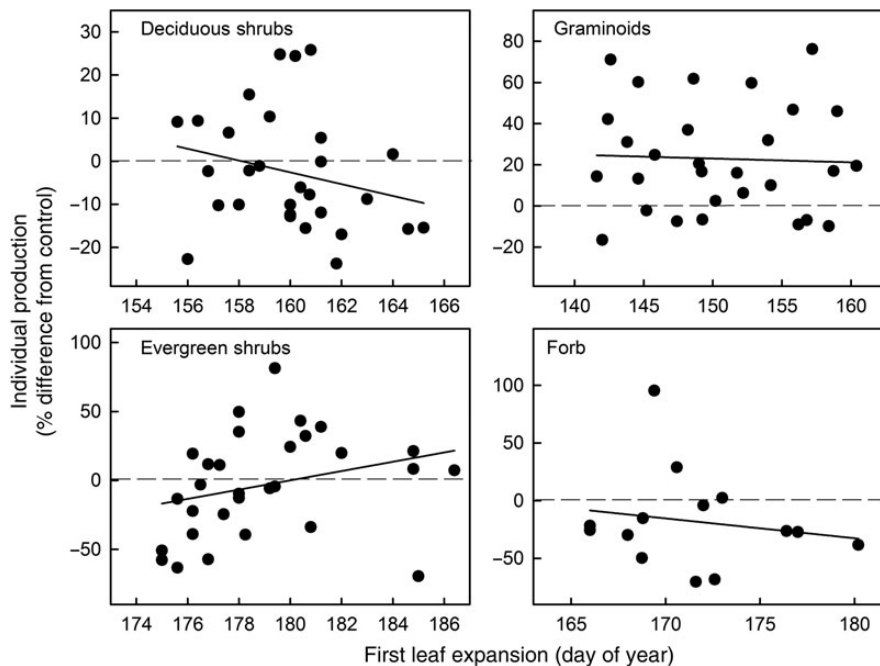

**Figure 6.** Relationship between phenology and production by functional group. Data follow Fig. 4. Solid lines are linear regressions for each functional group (see Results for details).

temperatures remain cold or freezing events occur (Inouye 2008; Wipf et al. 2009).

Production responses to warming and early snowmelt were dependent on growth form and individual species. One functional group (graminoids) matched our predicted direction of response, while others did not (forbs

and deciduous and evergreen shrubs). Previous warming experiments have also shown interspecific variation within tundra communities, with graminoids and deciduous shrubs showing rapid change relative to evergreen shrubs and forbs (Chapin and Shaver 1985; Chapin et al. 1995; Hollister et al. 2005b). The response of graminoids

in our study was consistent with these experiments, with both *E. vaginatum* and *C. bigelowii* increasing production in response to warming and early snowmelt. Although we measured biomass of individual tillers, new tiller recruitment is another likely mechanism by which either graminoid species could have increased biomass (Chapin and Shaver 1985). Graminoids were the only functional group that maintained their growth rates when snow was melted early, which may confer an advantage in accessing early-season nutrient pulses, and consequently increasing production in the same year (Shaver et al. 1986). Our results are generally consistent with past work on *E. vaginatum*, which showed that early-season air warming leads to accelerated leaf growth and earlier arrival at peak biomass (Sullivan and Welker 2005). Our observation that graminoids were also able to advance timing of early-season phenology to a greater extent than the other functional groups may be due to their ability to initiate growth underneath the snowpack and therefore have new leaves present at snowmelt in addition to green leaves that have overwintered (Chapin et al. 1979).

Warming resulted in a large decrease in production for the evergreen shrub, *V. vitis-idaea*, a species that has shown much variability in response to warming in previous experiments (Chapin et al. 1995; Arft et al. 1999; Zamin et al. 2014). A meta-analysis of warming experiments across the Arctic suggests that evergreen shrub response to warming depends on soil moisture regime, with plants in moist soils more often decreasing in abundance (Elmendorf et al. 2012a). Regardless, the large change in production that we observed was unexpected because evergreen shrubs have a conservative growth strategy, demonstrated by slower growth rates, lower specific leaf area and lower photosynthetic capacity than other species in the tundra community (Chapin and Shaver 1996; Starr et al. 2008). A decrease in new leaf biomass by *V. vitis-idaea* could be related to conditions in previous years, because evergreen shrub growth relies in part on nutrients stored in old leaves (Billings and Mooney 1968). Alternatively, *V. vitis-idaea* may be a poorer competitor than deciduous species (e.g. *B. nana*) for increased nutrients under warmed conditions (Shaver et al. 2001). Evergreen shrubs have the ability to access early-season nutrient pulses (McKane et al. 2002; Larsen et al. 2012) and photosynthesize under the snowpack (Starr and Oberbauer 2003), which may explain why both species increased production in response to early snowmelt, similar to graminoids. However, this does not explain why *V. vitis-idaea* would show the opposite response when early snowmelt was combined with warming.

Production of deciduous shrubs and a forb did not show clear responses to warming or early snowmelt. It may be

that the 3-year duration of our study did not allow enough time for *B. nana* or *S. pulchra* to show significant changes in production. Short- and long-term responses to warming in the moist acidic tundra have been shown to vary, in part because of slow recruitment and establishment of new individuals (Hollister et al. 2005b). For example, observations from the ITEX experiments showed that community changes in deciduous shrubs did not become significant until after 4 years of warming (Walker et al. 2006). However, since we measured growth at an individual (rather than community) level in order to detect within-season changes of biomass accumulation, the response of deciduous shrubs may be more likely attributed to nutrient availability in that year. If evergreen shrubs were able to access nutrient pulses early in the season before deciduous shrubs, it may help explain why the latter showed little response, specifically when snow was melted early. The one forb tested in this experiment, *P. bistorta*, had highly variable results which may have obscured any treatment effects.

While the magnitude of temporal shifts is often a focus of phenological studies, our results suggest that evolved strategies within the plant community also play an important role in determining responses to altered seasonality. We predicted that earlier leaf expansion would lead to greater production, and we found that this was true for early expanding species but not later expanding species. This demonstrates that temporal niche partitioning influences species' responses to environmental change. A previous study (Cleland et al. 2012) examined plant responses to warming and found that phenologically flexible species (able to 'track' climate change) had positive performance responses (e.g. increased abundance and production). Our results are only partially consistent with this result. In our study, changes in phenology alone did not always result in a change in production. Rather, community patterns of leaf expansion, along with warming-driven increases and decreases in ANPP (Fig. 5), contributed to a negative relationship between spring phenology and production (Fig. 4). If this relationship was representative of differences in functional groups alone, we would expect the relationship to hold among control plots, which was not the observed result (Fig. 5). Differences in the ability of species to shift the timing and rate of leaf expansion may affect competitive interactions and subsequently influence future plant community composition (Richardson et al. 2010; Cleland et al. 2012). Specifically, *E. vaginatum*, which was able to green rapidly and maintain its growth rate, may have a competitive advantage. Further, we predict that species that occupy early-season temporal niches across diverse ecosystems may increase in abundance under altered climate conditions.

## Conclusions

Changes in vegetative phenology, regardless of changes in production, have important implications for functioning of Arctic ecosystems. Phenological shifts can affect competition among species, and differential responses of individual species may determine future plant community structure. Changes in Arctic plant communities have the potential to affect multiple aspects of ecosystem function, including (i) carbon cycling, by altering the balance between ecosystem-scale photosynthesis and respiration (Shaver *et al.* 1992; Hobbie *et al.* 2000); (ii) surface energy balance and feedbacks to the climate system, through change in albedo and seasonal changes in leaf area (Peñuelas *et al.* 2009; Richardson *et al.* 2013); and (iii) trophic relationships that may become decoupled if plant phenology responds to a changing climate differently than vertebrate and invertebrate herbivores (Post and Forchhammer 2008; Høye *et al.* 2013). Our study suggests that an earlier spring as indicated by satellite data may be driven by early greening species such as *E. vaginatum* and *C. bigelowii*. These species have the advantage of being able to respond rapidly and positively to changes in seasonality, and may increase in abundance in tundra ecosystems as earlier snowmelt and warmer springs continue.

## Sources of Funding

Funding for the Snowmelt Project was provided by the National Science Foundation Office of Polar Programs Grants #PLR-1007672, 0902096 and 0902184. Additional funding for C.L. was provided by a National Science Foundation Graduate Research Fellowship.

## Contributions by the Authors

M.N.W., M.W., P.F.S., A.D.-N. and H.S. designed and implemented the experiment. C.L., A.D.-N. and H.S. collected data. C.L. and H.S. analysed the data and wrote the manuscript, and all authors contributed to revisions.

## Conflict of Interest Statement

None declared.

## Acknowledgements

We thank two anonymous reviewers for comments that improved the quality of this manuscript.

## Supporting Information

The following additional information is available in the online version of this article —

**Table S1.** Species composition at Imnavait Creek. Percent cover estimates are averaged over subplots for the entire experimental site.

**Table S2.** Microclimate variables in all 3 years of the experiment (2010–12). Air temperature, soil temperature and soil moisture were measured with automated sensors at each subplot throughout spring and summer, and are presented here as means over the observation period  $\pm$  1 SEM.

## Literature Cited

- Arft AM, Walker MD, Gurevitch J, Alatalo JM, Bret-Harte MS, Dale M, Diemer M, Gugerli F, Henry GHR, Jones MH, Hollister RD, Jónsdóttir IS, Laine K, Lévesque E, Marion GM, Molau U, Mølgaard P, Nordenhäll U, Raszhivin V, Robinson CH, Starr G, Stenström A, Stenström M, Totland Ø, Turner PL, Walker LJ, Webber PJ, Welker JM, Wookey PA. 1999. Responses of tundra plants to experimental warming: meta-analysis of the international tundra experiment. *Ecological Monographs* **69**:491–511.
- Billings WD, Mooney HA. 1968. The ecology of Arctic and alpine plants. *Biological Reviews* **43**:481–529.
- Borner AP, Kielland K, Walker MD. 2008. Effects of simulated climate change on plant phenology and nitrogen mineralization in Alaskan Arctic tundra. *Arctic, Antarctic, and Alpine Research* **40**:27–38.
- Bret-Harte MS, Shaver GR, Chapin FS III. 2002. Primary and secondary stem growth in arctic shrubs: implications for community response to environmental change. *Journal of Ecology* **90**:251–267.
- Campioli M, Leblans N, Michelsen A. 2012. Twenty-two years of warming, fertilisation and shading of subarctic heath shrubs promote secondary growth and plasticity but not primary growth. *PLoS ONE* **7**:e34842.
- Chapin FS III, Shaver GR. 1985. Individualistic growth response of tundra plant species to environmental manipulations in the field. *Ecology* **66**:564–576.
- Chapin FS III, Shaver GR. 1996. Physiological and growth responses of Arctic plants to a field experiment simulating climatic change. *Ecology* **77**:822–840.
- Chapin FS III, Van Cleve K, Chapin MC. 1979. Soil temperature and nutrient cycling in the tussock growth form of *Eriophorum vaginatum*. *Journal of Ecology* **67**:169–189.
- Chapin FS III, Shaver GR, Giblin AE, Nadelhoffer KJ, Laundre JA. 1995. Responses of Arctic tundra to experimental and observed changes in climate. *Ecology* **76**:694–711.
- Christensen JH, Kumar KK, Aldrian E, An S-I, Cavalcanti IFA, De Castro M, Dong W, Goswami P, Hall A, Kanyanga JK, Kitoh A, Kossin J, Lau N-C, Renwick J, Stephenson DB, Xie S-P, Zhou T. 2013. Climate phenomena and their relevance for future regional climate change. In: Stocker TF, Qin D, Plattner G-K, Tignor M, Allen SK, Boschung J, Nauels A, Xia Y, Bex V, Midgley PM, eds. *Climate Change 2013: The Physical Science Basis. Contribution of Working Group I to the Fifth Assessment Report of the Intergovernmental Panel on Climate Change*. Cambridge, UK: Cambridge University Press, 62.
- Cleland EE, Chiariello NR, Loarie SR, Mooney HA, Field CB. 2006. Diverse responses of phenology to global changes in a grassland ecosystem. *Proceedings of the National Academy of Sciences of the USA* **103**:13740–13744.
- Cleland EE, Chuine I, Menzel A, Mooney HA, Schwartz MD. 2007. Shifting plant phenology in response to global change. *Trends in Ecology and Evolution* **22**:357–365.



- Cleland EE, Allen JM, Crimmins TM, Dunne JA, Pau S, Travers SE, Zavaleta ES, Wolkovich EM. 2012. Phenological tracking enables positive species responses to climate change. *Ecology* **93**: 1765–1771.
- Dawes MA, Hagedorn F, Zumbrunn T, Handa IT, Hättenschwiler S, Wipf S, Rixen C. 2011. Growth and community responses of alpine dwarf shrubs to *in situ* CO<sub>2</sub> enrichment and soil warming. *New Phytologist* **191**:806–818.
- Dukes JS, Chiariello NR, Cleland EE, Moore LA, Shaw MR, Thayer S, Tobeck T, Mooney HA, Field CB. 2005. Responses of grassland production to single and multiple global environmental changes. *PLoS Biology* **3**:e319.
- Edwards KA, Jefferies RL. 2013. Inter-annual and seasonal dynamics of soil microbial biomass and nutrients in wet and dry low-Arctic sedge meadows. *Soil Biology and Biochemistry* **57**:83–90.
- Elmendorf SC, Henry GHR, Hollister RD, Björk RG, Bjorkman AD, Callaghan TV, Collier LS, Cooper EJ, Cornelissen JHC, Day TA, Fosaa AM, Gould WA, Grétarsdóttir J, Harte J, Hermanutz L, Hik DS, Hofgaard A, Jarrad F, Jónsdóttir IS, Keuper F, Klanderud K, Klein JA, Koh S, Kudo G, Lang SI, Loewen V, May JL, Mercado J, Michelsen A, Molau U, Myers-Smith IH, Oberbauer SF, Pieper S, Post ES, Rixen C, Robinson CH, Schmidt NM, Shaver GR, Stenstrom A, Tolvanen A, Totland Ø, Troxler T, Wahren C-H, Webber PJ, Welker JM, Wookey PA. 2012a. Global assessment of experimental climate warming on tundra vegetation: heterogeneity over space and time. *Ecology Letters* **15**:164–175.
- Elmendorf SC, Henry GHR, Hollister RD, Björk RG, Boulanger-Lapointe N, Cooper EJ, Cornelissen JHC, Day TA, Dorrepaal E, Elumeeva TG, Gill M, Gould WA, Harte J, Hik DS, Hofgaard A, Johnson DR, Johnstone JF, Jónsdóttir IS, Jorgenson JC, Klanderud K, Klein JA, Koh S, Kudo G, Lara M, Lévesque E, Magnússon B, May JL, Mercado-Díaz JA, Michelsen A, Molau U, Myers-Smith IH, Oberbauer SF, Onipchenko VG, Rixen C, Martin Schmidt N, Shaver GR, Spasojevic MJ, Þórhallsdóttir ÞE, Tolvanen A, Troxler T, Tweedie CE, Villareal S, Wahren C-H, Walker X, Webber PJ, Welker JM, Wipf S. 2012b. Plot-scale evidence of tundra vegetation change and links to recent summer warming. *Nature Climate Change* **2**:453–457.
- Ernakovich JG, Hopping KA, Berdanier AB, Simpson RT, Kachergis EJ, Steltzer H, Wallenstein MD. 2014. Predicted responses of Arctic and alpine ecosystems to altered seasonality under climate change. *Global Change Biology* **20**:3256–3269.
- Fay PA, Carlisle JD, Knapp AK, Blair JM, Collins SL. 2003. Productivity responses to altered rainfall patterns in a C<sub>4</sub>-dominated grassland. *Oecologia* **137**:245–251.
- Fitter AH, Fitter RSR. 2002. Rapid changes in flowering time in British plants. *Science (New York, N.Y.)* **296**:1689–1691.
- Forbes BC, Fauria MM, Zetterberg P. 2010. Russian Arctic warming and ‘greening’ are closely tracked by tundra shrub willows. *Global Change Biology* **16**:1542–1554.
- Fraser RH, Olthof I, Carrière M, Deschamps A, Pouliot D. 2011. Detecting long-term changes to vegetation in northern Canada using the Landsat satellite image archive. *Environmental Research Letters* **6**:045502.
- Galen C, Stanton ML. 1995. Responses of snowbed plant species to changes in growing-season length. *Ecology* **76**:1546–1557.
- Gottfried M, Pauli H, Futschik A, Akhalkatsi M, Barančok P, Alonso JLB, Coldea G, Dick J, Erschbamer B, Calzado MRF, Kazakis G, Krajčí J, Larsson P, Mallaun M, Michelsen O, Moiseev D, Moiseev P, Molau U, Merzouki A, Nagy L, Nakhutsrishvili G, Pedersen B, Pelino G, Púscas M, Rossi G, Stanisci A, Theurillat J-P, Tomaselli M, Villar L, Vittoz P, Vogiatzakis I, Grabherr G. 2012. Continent-wide response of mountain vegetation to climate change. *Nature Climate Change* **2**:111–115.
- Harte J, Shaw R. 1995. Shifting dominance within a montane vegetation community: results of a climate-warming experiment. *Science (New York, N.Y.)* **267**:876–880.
- Hayhoe K, Wake CP, Huntington TG, Luo L, Schwartz MD, Sheffield J, Wood E, Anderson B, Bradbury J, Degaetano A, Troy TJ, Wolfe D. 2007. Past and future changes in climate and hydrological indicators in the US Northeast. *Climate Dynamics* **28**:381–407.
- Hobbie SE, Schimel JP, Trumbore SE, Randerson JR. 2000. Controls over carbon storage and turnover in high-latitude soils. *Global Change Biology* **6**:196–210.
- Hollister RD, Webber PJ, Bay C. 2005a. Plant response to temperature in Northern Alaska: implications for predicting vegetation change. *Ecology* **86**:1562–1570.
- Hollister RD, Webber PJ, Tweedie CE. 2005b. The response of Alaskan arctic tundra to experimental warming: differences between short- and long-term responses. *Global Change Biology* **11**: 525–536.
- Høye TT, Post E, Meltofte H, Schmidt NM, Forchhammer MC. 2007. Rapid advancement of spring in the High Arctic. *Current Biology* **17**:R449–R451.
- Høye TT, Post E, Schmidt NM, Trøjelsgaard K, Forchhammer MC. 2013. Shorter flowering seasons and declining abundance of flower visitors in a warmer Arctic. *Nature Climate Change* **3**:1–5.
- Inouye DW. 2008. Effects of climate change on phenology, frost damage, and floral abundance of montane wildflowers. *Ecology* **89**:353–362.
- Jia GJ, Epstein HE, Walker DA. 2003. Greening of arctic Alaska, 1981–2001. *Geophysical Research Letters* **30**:3–6.
- Jia GJ, Epstein HE, Walker DA. 2009. Vegetation greening in the Canadian Arctic related to decadal warming. *Journal of Environmental Monitoring* **11**:2231–2238.
- Knapp AK, Smith MD. 2001. Variation among biomes in temporal dynamics of aboveground primary production. *Science* **291**: 481–484.
- Körner C, Basler D. 2010. Phenology under global warming. *Science* **327**:1461–1462.
- Larsen KS, Michelsen A, Jonasson S, Beier C, Grogan P. 2012. Nitrogen uptake during fall, winter and spring differs among plant functional groups in a Subarctic heath ecosystem. *Ecosystems* **15**:927–939.
- Marchin RM, Salk CF, Hoffmann WA, Dunn RR. 2015. Temperature alone does not explain phenological variation of diverse temperate plants under experimental warming. *Global Change Biology* **21**:3138–3151.
- Marion GM, Henry GHR, Freckman DW, Johnstone J, Jones G, Jones MH, Lévesque E, Molau U, Mølgård P, Parsons AN, Svoboda J, Virginia RA. 1997. Open-top designs for manipulating field temperature in high-latitude ecosystems. *Global Change Biology* **3**:20–32.
- Mckane RB, Johnson LC, Shaver GR, Nadelhoffer KJ, Rastetter EB, Fry B, Giblin AE, Kielland K, Kwiatkowski BL, Laundre JA, Murray G. 2002. Resource-based niches provide a basis for plant species diversity and dominance in arctic tundra. *Nature* **415**:68–71.
- Menzel A, Sparks TH, Estrella N, Koch E, Aasa A, Ahas R, Alm-Kübler K, Bissolli P, Braslavská O, Briede A, Chmielewski FM, Crepinsek Z,



- Curnel Y, Dahl Å, Defila C, Donnelly A, Filella Y, Jatczak K, Måge F, Mestre A, Nordli Ø, Peñuelas J, Pirinen P, Remišová V, Scheffinger H, Striz M, Susnik A, Van Vliet AJH, Wielgolaski F-E, Zach S, Züst A. 2006. European phenological response to climate change matches the warming pattern. *Global Change Biology* **12**: 1969–1976.
- Muldavin EH, Moore DI, Collins SL, Wetherill KR, Lightfoot DC. 2008. Aboveground net primary production dynamics in a northern Chihuahuan Desert ecosystem. *Oecologia* **155**:123–132.
- Myneni RB, Keeling CD, Tucker CJ, Asrar G, Nemani RR. 1997. Increased plant growth in the northern high latitudes from 1981 to 1991. *Nature* **386**:698–702.
- Pau S, Wolkovich EM, Cook BI, Davies TJ, Kraft NJB, Bolmgren K, Betancourt JL, Cleland EE. 2011. Predicting phenology by integrating ecology, evolution and climate science. *Global Change Biology* **17**:3633–3643.
- Peñuelas J, Rutishauser T, Filella I. 2009. Phenology feedbacks on climate change. *Science* **324**:887–888.
- Polgar CA, Primack RB. 2011. Leaf-out phenology of temperate woody plants: from trees to ecosystems. *The New Phytologist* **191**:926–941.
- Post E, Forchhammer MC. 2008. Climate change reduces reproductive success of an Arctic herbivore through trophic mismatch. *Philosophical Transactions of the Royal Society of London. Series B, Biological Sciences* **363**:2369–2375.
- Reyes-Fox M, Steltzer H, Trlica MJ, McMaster GS, Andales AA, Lecain DR, Morgan JA. 2014. Elevated CO<sub>2</sub> further lengthens growing season under warming conditions. *Nature* **510**: 259–262.
- Richardson AD, Black TA, Ciais P, Delbart N, Friedl MA, Gobron N, Hollinger DY, Kutsch WL, Longdoz B, Luyssaert S, Migliavacca M, Montagnani L, Munger JW, Moors E, Piao S, Rebmann C, Reichstein M, Saigusa N, Tomelleri E, Vargas R, Varlagin A. 2010. Influence of spring and autumn phenological transitions on forest ecosystem productivity. *Philosophical Transactions of the Royal Society of London. Series B, Biological Sciences* **365**: 3227–3246.
- Richardson AD, Anderson RS, Arain MA, Barr AG, Bohrer G, Chen G, Chen JM, Ciais P, Davis KJ, Desai AR, Dietze MC, Dragoni D, Garrity SR, Gough CM, Grant R, Hollinger DY, Margolis HA, McCaughey H, Migliavacca M, Monson RK, Munger JW, Poulter B, Raczka BM, Ricciuto DM, Sahoo AK, Schaefer K, Tian H, Vargas R, Verbeeck H, Xiao J, Xue Y. 2012. Terrestrial biosphere models need better representation of vegetation phenology: results from the North American Carbon Program Site Synthesis. *Global Change Biology* **18**:566–584.
- Richardson AD, Keenan TF, Migliavacca M, Ryu Y, Sonnentag O, Toomey M. 2013. Climate change, phenology, and phenological control of vegetation feedbacks to the climate system. *Agricultural and Forest Meteorology* **169**:156–173.
- Schwartz MD. 1998. Green-wave phenology. *Nature* **394**:839–840.
- Schwartz MD, Ahas R, Aasa A. 2006. Onset of spring starting earlier across the Northern Hemisphere. *Global Change Biology* **12**: 343–351.
- Serreze MC, Walsh JE, Chapin FS III, Osterkamp T, Dyurgerov M, Romanovsky V, Oechel WC, Morison J, Zhang T, Barry RG. 2000. Observational evidence of recent change in the northern high-latitude environment. *Climatic Change* **46**:159–207.
- Shaver GR. 1986. Woody stem production in Alaskan tundra shrubs. *Ecology* **67**:660–669.
- Shaver GR, Chapin FS III, Gartner BL. 1986. Factors limiting seasonal growth and peak biomass accumulation in *Eriophorum vaginatum* in Alaskan tussock tundra. *Journal of Ecology* **74**:257–278.
- Shaver GR, Billings WD, Chapin FS III, Giblin AE, Nadelhoffer KJ, Oechel WC, Rastetter EB. 1992. Global change and the carbon balance of Arctic ecosystems. *BioScience* **42**:433–441.
- Shaver GR, Bret-Harte MS, Jones MH, Johnstone J, Gough L, Laundre J, Chapin FS III. 2001. Species composition interacts with fertilizer to control long-term change in tundra productivity. *Ecology* **82**:3163–3181.
- Sherry RA, Zhou X, Gu S, Arnone JA III, Schimel DS, Verburg PS, Wallace LL, Luo Y. 2007. Divergence of reproductive phenology under climate warming. *Proceedings of the National Academy of Sciences of the USA* **104**:198–202.
- Sistla SA, Moore JC, Simpson RT, Gough L, Shaver GR, Schimel JP. 2013. Long-term warming restructures Arctic tundra without changing net soil carbon storage. *Nature* **497**:615–618.
- Smith MD, La Pierre KJ, Collins SL, Knapp AK, Gross KL, Barrett JE, Frey SD, Gough L, Miller RJ, Morris JT, Rustad LE, Yarie J. 2015. Global environmental change and the nature of aboveground net primary productivity responses: insights from long-term experiments. *Oecologia* **935**–947.
- Starr G, Oberbauer SF. 2003. Photosynthesis of arctic evergreens under snow: implications for tundra ecosystem carbon balance. *Ecology* **84**:1415–1420.
- Starr G, Oberbauer SF, Ahlquist LE. 2008. The photosynthetic response of Alaskan tundra plants to increased season length and soil warming. *Arctic, Antarctic, and Alpine Research* **40**: 181–191.
- Steltzer H, Landry C, Painter TH, Anderson J, Ayres E. 2009. Biological consequences of earlier snowmelt from desert dust deposition in alpine landscapes. *Proceedings of the National Academy of Sciences of the USA* **106**:11629–11634.
- Sullivan PF, Welker JM. 2005. Warming chambers stimulate early season growth of an arctic sedge: results of a minirhizotron field study. *Oecologia* **142**:616–626.
- Sweet SK, Gough L, Griffin KL, Boelman NT. 2014. Tall deciduous shrubs offset delayed start of growing season through rapid leaf development in the Alaskan Arctic tundra. *Arctic, Antarctic, and Alpine Research* **46**:682–697.
- Sweet SK, Griffin KL, Steltzer H, Gough L, Boelman NT. 2015. Greater deciduous shrub abundance extends tundra peak season and increases modeled net CO<sub>2</sub> uptake. *Global Change Biology* **21**: 2394–2409.
- Tape K, Sturm M, Racine C. 2006. The evidence for shrub expansion in Northern Alaska and the Pan-Arctic. *Global Change Biology* **12**: 686–702.
- Thompson R, Clark RM. 2008. Is spring starting earlier? *The Holocene* **18**:95–104.
- Wahren C-HA, Walker MD, Bret-Harte MS. 2005. Vegetation responses in Alaskan arctic tundra after 8 years of a summer warming and winter snow manipulation experiment. *Global Change Biology* **11**:537–552.
- Walker MD, Walker DA, Auerbach N. 1994. Plant communities of a tussock tundra landscape in the Brooks Range Foothills, Alaska. *Journal of Vegetation Science* **5**:843–866.
- Walker MD, Wahren CH, Hollister RD, Henry GHR, Ahlquist LE, Alatalo JM, Bret-Harte MS, Calef MP, Callaghan TV, Carroll AB, Epstein HE, Jónsdóttir IS, Klein JA, Magnússon B, Molau U,

- Oberbauer SF, Rewa SP, Robinson CH, Shaver GR, Suding KN, Thompson CC, Tolvanen A, Totland Ø, Turner PL, Tweedie CE, Webber PJ, Wookey PA. 2006. Plant community responses to experimental warming across the tundra biome. *Proceedings of the National Academy of Sciences of the USA* **103**:1342–1346.
- Walther G-R, Beißner S, Burga CA. 2005. Trends in the upward shift of alpine plants. *Journal of Vegetation Science* **16**: 541–548.
- Wang S, Duan J, Xu G, Wang Y, Zhang Z, Rui Y, Luo C, Xu B, Zhu X, Chang X, Cui X, Niu H, Zhao X, Wang W. 2012. Effects of warming and grazing on soil N availability, species composition, and ANPP in an alpine meadow. *Ecology* **93**:2365–2376.
- Weintraub MN, Schimel JP. 2005. The seasonal dynamics of amino acids and other nutrients in Alaskan Arctic tundra soils. *Biogeochemistry* **73**:359–380.
- Whittinghill KA, Hobbie SE. 2011. Effects of landscape age on soil organic matter processing in Northern Alaska. *Soil Science Society of America Journal* **75**:907–917.
- Willis CG, Ruhfel B, Primack RB, Miller-Rushing AJ, Davis CC. 2008. Phylogenetic patterns of species loss in Thoreau's woods are driven by climate change. *Proceedings of the National Academy of Sciences of the USA* **105**:17029–17033.
- Wipf S, Rixen C. 2010. A review of snow manipulation experiments in Arctic and alpine tundra ecosystems. *Polar Research* **29**:95–109.
- Wipf S, Stoeckli V, Bebi P. 2009. Winter climate change in alpine tundra: plant responses to changes in snow depth and snowmelt timing. *Climatic Change* **94**:105–121.
- Wolkovich EM, Cook BI, Allen JM, Crimmins TM, Betancourt JL, Travers SE, Pau S, Regetz J, Davies TJ, Kraft NJB, Ault TR, Bolmgren K, Mazer SJ, McCabe GJ, McGill BJ, Parmesan C, Salamin N, Schwartz MD, Cleland EE. 2012. Warming experiments underpredict plant phenological responses to climate change. *Nature* **485**:494–497.
- Zamin TJ, Bret-Harte MS, Grogan P. 2014. Evergreen shrubs dominate responses to experimental summer warming and fertilization in Canadian mesic low arctic tundra. *Journal of Ecology*. doi:10.1111/1365-2745.12237
- Zavaleta ES, Shaw MR, Chiariello NR, Thomas BD, Cleland EE, Field CB, Mooney HA. 2003. Grassland responses to three years of elevated temperature, CO<sub>2</sub>, precipitation, and N deposition. *Ecological Monographs* **73**:585–604.
- Zeng H, Jia G, Epstein H. 2011. Recent changes in phenology over the northern high latitudes detected from multi-satellite data. *Environmental Research Letters* **6**:45508.
